# Supplementary material for: Contribution of Circulating Mfge8 to Human T2DM and Cardiovascular Disease
Source: Preprints.org preprint supplement (doi:10.20944/preprints202402.0454.v1), 2024-02-07
Supplement: Supplementary file 1 [file supplementary]

**Supplementary Table 1a:** Correlation of Mfge8 concentrations with diabetes risk traits in AIDHS/SDS

|  | **Carriers** | | **Non-carriers** | |
| --- | --- | --- | --- | --- |
| **Traits** | **Pearson Correlation (r)** | **p-value** | **Pearson Correlation (r)** | **p-value** |
| BMI (Kg/m2) | -0.12 | 0.34 | -0.25 | 0.03 |
| Systolic BP (mmHg) | 0.24 | 0.07 | -0.18 | 0.13 |
| Diastolic BP (mmHg) | 0.13 | 0.30 | -0.09 | 0.46 |
| Triglycerides (mg/dL) | 0.19 | 0.15 | -0.26 | 0.03 |
| T2DM | **0.38** | **0.001** | -0.29 | 0.01 |

AIDHS/SDS: Asian Indian Diabetic Heart Study/Sikh Diabetes Study; BMI: Body mass index; BP: Blood Pressure; T2D: Type 2 diabetes mellitus

**Supplementary Table 1b:** Correlation of Mfge8 concentrations with diabetes risk traits in MISS

|  | **Combined** | | **T2DM Cases** | | **T2DM controls** | |
| --- | --- | --- | --- | --- | --- | --- |
| **Traits** | **Pearson Correlation (r)** | **P-value** | **Pearson Correlation (r)** | **P-value** | **Pearson Correlation (r)** | **P-value** |
| BMI (Kg/m2) | -0.003 | 0.98 | -0.12 | 0.53 | -0.32 | 0.09 |
| Systolic BP (mmHg) | 0.13 | 0.38 | -0.06 | 0.73 | 0.34 | 0.21 |
| Diastolic BP (mmHg) | 0.11 | 0.48 | -0.02 | 0.93 | 0.58 | 0.02 |
| Triglycerides (mg/dL) | 0.17 | 0.29 | -0.10 | 0.62 | 0.28 | 0.38 |
| T2DM | 0.12 | 0.35 | - | | - | |

MISS: Metabolome in Ischemic Stroke Study; BMI: Body mass index; BP: Blood Pressure; T2D: Type 2 diabetes mellitus
